# Supplementary material for: The influence of natural factors on the spatial distribution of aufeis in Ulaanbaatar, Mongolia
Source: Frontiers journal article supplement (doi:10.3389/feart.2025.1611054), 2025-07-01
Supplement: Data_Sheet_1.pdf [file Data_Sheet_1.pdf]

## *Supplementary Material*

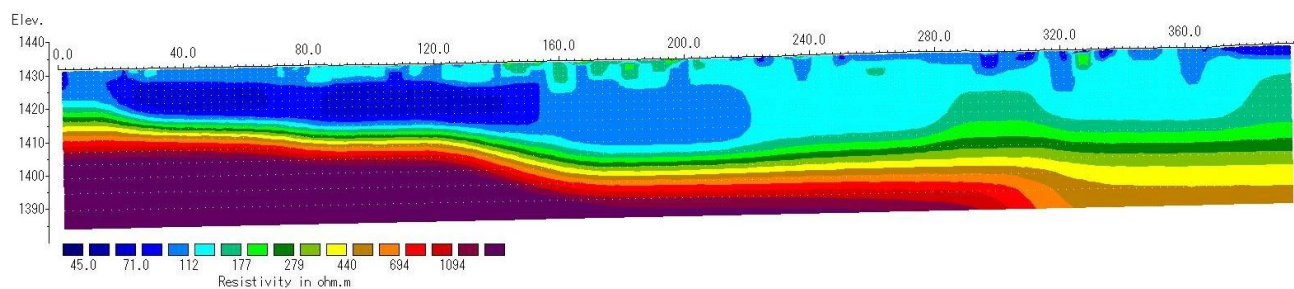

**Supplementary Figure 1. ERT profile 4 (autumn 2024)**

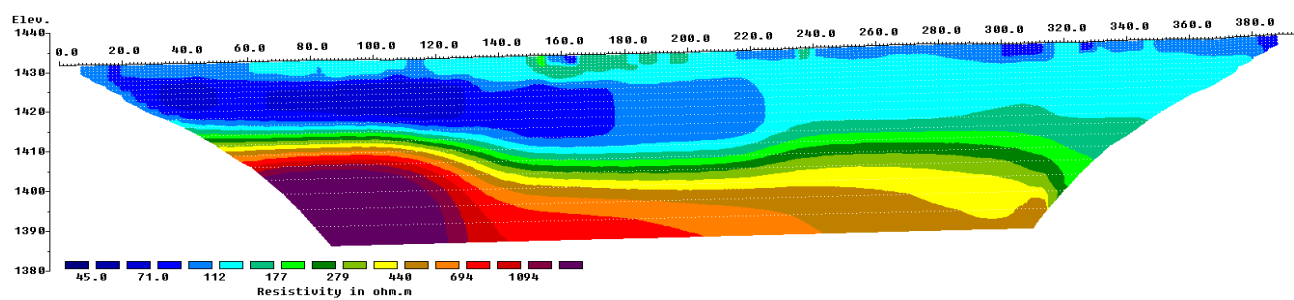

**Supplementary Figure 2. ERT profile 4 (autumn 2023)**
